# Safety-Stock: Predicting supply chain demand in Brazilian hospitals during the COVID-19 pandemic

Oilson Alberto Gonzatto Junior<sup>1</sup>, Diego Carvalho do Nascimento<sup>1</sup>, Cibele Maria Russo<sup>1</sup>, Marcos Jardel Henriques<sup>1</sup>, Caio Paziani Tomazella<sup>1</sup>, Maristela Oliveira Santos<sup>1</sup>, Denis Neves<sup>2</sup>, Diego Assad<sup>2</sup>, Rafaela Guerra<sup>2</sup>, Evelyn Keise Bertazo<sup>2</sup>, José Alberto Cuminato<sup>1</sup> and Francisco Louzada<sup>1,\*</sup>

<sup>1</sup> *Department of Applied Mathematics and Statistics, Institute of Mathematical and Computer Sciences, University of São Paulo, São Carlos Campus, Brazil*

<sup>2</sup> *Bionexo, São Paulo, Brazil*

Correspondence\*:

\* [louzada@icmc.usp.br](mailto:louzada@icmc.usp.br)

## 2 ABSTRACT

3 Background: Many challenges lie ahead for COVID-19, not only related to the acceleration  
4 of the pandemic, but also to the prediction of the hospital's personal protective equipment  
5 to accommodate the explosive demand. Due to the situation of uncertainty, the hospital  
6 administration encourages the excess stock of these materials, causing excess products in  
7 some hospitals, but shortages in others. Although three main factors limit the number of patients  
8 seen at a hospital: the number of beds available, the number of equipment, and, above all, the  
9 number of health professionals available at the hospital, per shift.

10 Objective: In this scenario, a challenge is to build an easy-to-use expert system to predict the  
11 demand for personal protective equipment in hospitals during the COVID-19 pandemic, with  
12 updating in real-time.

13 Methods: We propose naive statistical modeling, which combines historical data on the  
14 consumption of personal protective equipment by hospitals, current protocols for their uses  
15 and epidemiological data related to the disease, in order to build predictive models for the  
16 demand for personal protective equipment in Brazilian hospitals during the pandemic. We then  
17 embed our modeling in the free Safety-Stock expert system, that can provide the safety stock for  
18 a particular hospital.

19 Results: The Safety-Stock provides prediction of consumption/demand for personal protective  
20 equipment over time, indicating the moment when the hospital reaches maximum consumption,  
21 the estimate of how long it will work in this state, and when it will leave it, mitigating risk of  
22 stockouts.

23 Conclusion: With our prediction, a hospital may have estimated, based on its stock levels and  
24 possible new purchases, its needs related to a specific personal protective equipment, which  
25 allows for the adoption of strategies to control and keep the stock at safety levels to the demand.  
26 As a direct consequence, it enables interchange and cooperation between hospitals, aiming to  
27 maximize the care during the pandemic.

28 **Keywords:** COVID-19 Pandemic, Outbreak, Healthcare Supply Chain, stockout's mitigating risk, easy-to-use free computational tool.

NOTE: This preprint reports new research that has not been certified by peer review and should not be used to guide clinical practice.

## 1 INTRODUCTION

29 As of May 24, 2020, more than 5.4 million confirmed positive cases of COVID-19 worldwide, with 345,000  
30 global deaths and more than 360,000 confirmed cases in Brazil (15). Hospital systems around the world  
31 have been overwhelmed by the volume of cases, including shortages of personal protective equipment  
32 (PPE), critical medical supplies and increasing costs (7). In this scenario of scarce hospital resources, a  
33 challenge is to build an easy-to-use tool to predict the demand for PPE in hospitals during the COVID-19  
34 pandemic.

35 Indeed, due in large part to the increase in demand, technological solutions for the management of  
36 processes in the health area are necessary, using historical data from hospital supplies. Factors such as price  
37 increases and difficulties in purchasing critical supplies without long terms require intelligent maintenance  
38 of the stock so that there is no shortage of supplies in hospitals. It is worth noting that the supply chain  
39 represents the second largest expense for hospitals (1).

40 In this paper, we propose naive statistical modeling, which combines historical data on the consumption  
41 of PPE by hospitals, current protocols for their uses, and epidemiological data related to the disease, in  
42 order to build predictive models for the demand of a hospital for PPE in Brazilian hospitals during the  
43 pandemic. We then embed our modeling in an free expert system, hereafter Safety-Stock, that presents  
44 predictions of consumption/demand for PPEs overtime in real-time. The Safety-Stock indicates the time  
45 when the hospital reaches its maximum consumption, estimates how long it will work in this state and  
46 when it will leave it. The structure of our modeling is graphically summarized in Figure 1.

47 With our prediction, a hospital may estimate, based on its stock levels and future purchases, its needs  
48 related to a specific PPE, which allows the adoption of strategies to keep stock levels that are adequate to  
49 the demand. As a direct consequence, it enables interchange and cooperation between hospitals, aiming to  
50 maximize the care during the pandemic.

51 The paper is organized as follows. Section 2 is dedicated to describing the data and statistical modeling.  
52 The Safety-Stock description and the results of applying our modeling for several different Brazilian  
53 hospitals are presented in Sections 3. Some final comments in Section 4 complete the paper.

## 2 MATERIAL & METHODS

54 Our modeling uses prediction parametric models to meet the PPE demand of a hospital, provided based on  
55 the estimated epidemic curve, as well as characteristics related to the hospital, as well as other variables,  
56 such as hospitalization rate, frequency of emergency care, number of beds available.

57 Indeed, we propose a mathematical/statistical model that expresses the expected relationship of the  
58 consumption of a given PPE over time, with the epidemiological characteristics of the region and also with  
59 the internal characteristics of a particular hospital. For this, we take into account three fundamental fronts:  
60 the recent historical record of hospital consumption of a PPE; the maximum possible level of consumption  
61 of a PPE; the magnitude of the stay in a maximum consumption regime. Each of these characteristics  
62 requires the observation of different sources of information and generates meaningful interpretations for  
63 the model's construction.

64 The information used, in the modeling process, was obtained from three perspectives, which reverberates  
65 the relationship across which point in time will the hospital started working on a maximum consumption  
66 regime (for each PPE) and for how long it will remain under this pandemic regime.

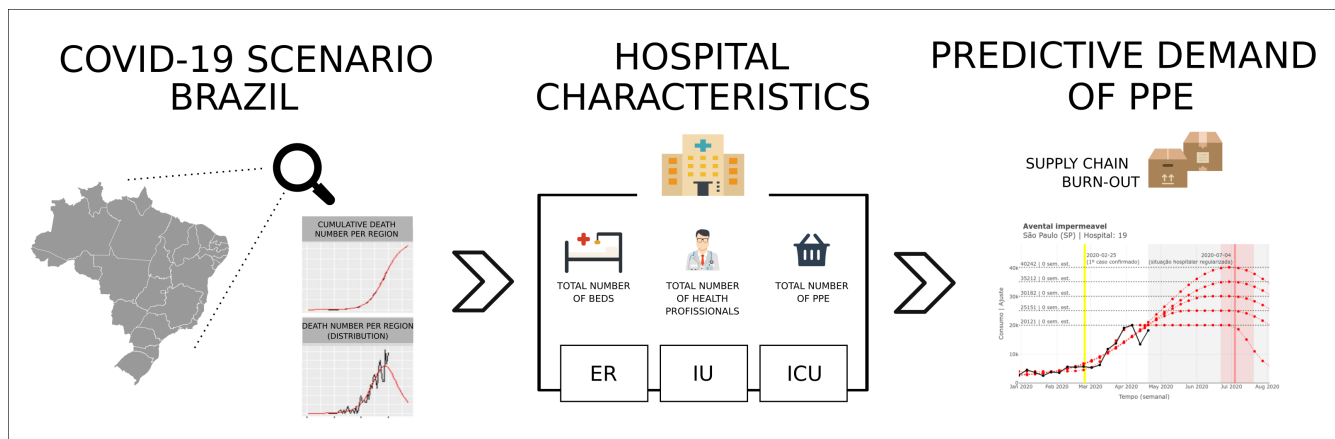

**Figure 1.** Overview of the structure used in the proposed modeling. The process adopted by the algorithm is to estimate the number of infected patient which will demand some assistance and combined with the hospital capacities and characteristics, predict the PPE related with the COVID-19 pandemic.

67 Indeed, for the development of the proposed approach, the following characteristics related to the hospital  
68 are considered:

- 69 • List of PPE and other healthcare supplies, such as hand sanitizer, waterproof aprons, sterile gloves,  
70 procedure gloves, surgical mask, and N95 masks and caps.
- 71 • Availability of these supplies in stock at the hospital (units of the items available to be used).
- 72 • Forecast of weekly consumption: this demand is calculated considering the expected number of  
73 hospitalizations of the hospital and the consumption of inputs per hospitalization, or the consumption  
74 of inputs according to the hospital's occupancy rate (offer as calculated, as we consider the curve). In  
75 addition to consumption, it is necessary to know how these data are calculated, and the hospital must  
76 check their calculation.
- 77 • The available beds separated or not by the type of case (mild, severe, and critical). For each type of  
78 bed, the average number of days of hospitalization will be used (for simulation over a longer period).  
79 The hospital will provide both the number of beds and the average occupancy.
- 80 • Value of the safety stock (minimum stock of each input or as calculated by the hospital).
- 81 • Initial conditions: what is the hospital occupation and days that each bed will be occupied (hospital  
82 estimate).

83 Besides, the curves related to demand estimated by the city of Brazil were constructed using a growth  
84 model to meet demand from the worst-case situation. We also used information related to the hospital  
85 concerning PPE and its infra-structure for occupation. Moreover, we consider the prediction of the demand  
86 for hospitalizations and the number of health staff.

87 The statistical model that parameterizes these data simulates the use of resources about consumption, and  
88 aims to obtain an indication of the safety stock for each PPE, considering the possibility of having a certain  
89 amount. Further details of the statistical modeling can be found in Appendix A.

### 3 RESULTS

90 We developed the Safety-Stock, an easy-to-use expert system, which combines different elements  
91 informed by the hospital under analysis. It is freely available in [https://cemeai.shinyapps.io/  
92 bionexo\\_covid19/](https://cemeai.shinyapps.io/bionexo_covid19/) (in Portuguese). The pieces of information needed for feeding the platform are

93 divided into three dimensions: *consumption and stock information*, which are hospital general information,  
94 such as, location (state and city), PPE general classes, weekly consumption, current stock level; *disease*  
95 *behavior in the hospital under study*, which are hospital pandemic dynamic data, such as percentage of  
96 hospitalized infected patients, percentage of ICU hospitalized patients, the average length of stay, number  
97 of beds and occupancy rate; and *forecast of scenarios related to demand*, which are hospital demand  
98 prediction data, such as prediction horizon, security percentage, and maximum consumption.

99 The first step is to estimate the death growth related to each region. A growth curve function is adopted to  
100 predict the number of deaths in the city where the hospital lies. For instance, the three-parameters logistic  
101 (11, chap. 6) or the Gompertz function (14). Figure 2 panels (a) show each cumulative number of death,  
102 exemplified by five cities in Brazil: Belo Horizonte (MG), Recife (PE), Curitiba (PR), Porto Alegre (RS)  
103 and São Paulo (SP).

104 Then, based on the process described in Appendix C, we obtain the behavior for regional demand for each  
105 city (Figure 2 panels (b)), which expresses a particular behavior concerning the dynamics of the disease.  
106 The fraction of such curve that fits a specific hospital depends on the market-share associated with it, and  
107 the cut-line that represents its current capacity (in terms of the number of free ICU beds) considers the total  
108 number of beds and the respective occupancy rates (Figure 2 panels (c)). With this step, we determine the  
109 cut-line that gives us an indication of when the hospital situation begins to regularize.

110 Subsequently, a simulated hospital structure, described in Appendix B, in response to demand focused  
111 exclusively on the COVID-19 pandemic, is considered. This simulated hospital's composition was an  
112 essential element for estimating the threshold that relates to the maximum consumption of PPE, the number  
113 of beds available, the size of the health team, and the used protocol. With this step, we defined a technically  
114 standardized level for maximum consumption, on which we established some variation in its surroundings  
115 to contemplate possible changes in the protocol due to the pandemic situation.

116 The next step consists in adjusting the conditioned model to the information obtained in the previous  
117 steps. Thus, we established a forecast for the weekly PPE consumption of a hospital under analysis  
118 through models considering some possible scenarios. Figure 3 presents the estimate in which the pandemic  
119 presents a potential risk to the hospital situation as a result. The generated scenarios consider the historical  
120 consumption of a PPE in particular, the theoretical premises for the use of PPE based on the magnitude of  
121 the hospital, and the effects of the pandemic observed in its region. The gray margin exposes the forecast  
122 horizon.

123 Still, in Figure 3, each consumption limit line also indicates the security of the available stock in terms of  
124 the number of weeks that the current stock would last if there were no new entries. The red dashed lines  
125 represent upper limits for consumption, considering the growth trend of previous records and different total  
126 consumption levels, the transparent red margins represent the 2.5% and 97.5% limits for predicted curve.  
127 The blue dot denotes the current stock position. The transparent blue margins represent the minimum and  
128 maximum stock limits. The yellow line showed the date when the first case of COVID-19 was identified in  
129 its municipality. The vertical line in light-blue represents a cut-line from which we believe that the hospital  
130 situation will return to normal. The transparent margin around it expresses the uncertainty involved in this  
131 expectation.

132 This value for maximum consumption will be given as input to the model (submitted in the Maximum  
133 consumption field), and it will be recalculated, making the specific analysis to hospital reality (3b). The red  
134 line is the upper limit for consumption, where growth occurs with the intensity outlined by the historical  
135 record and considering its consumption protocol.

**Gonzatto et al. Safety-Stock: Predicting supply chain demand during the COVID-19 pandemic**

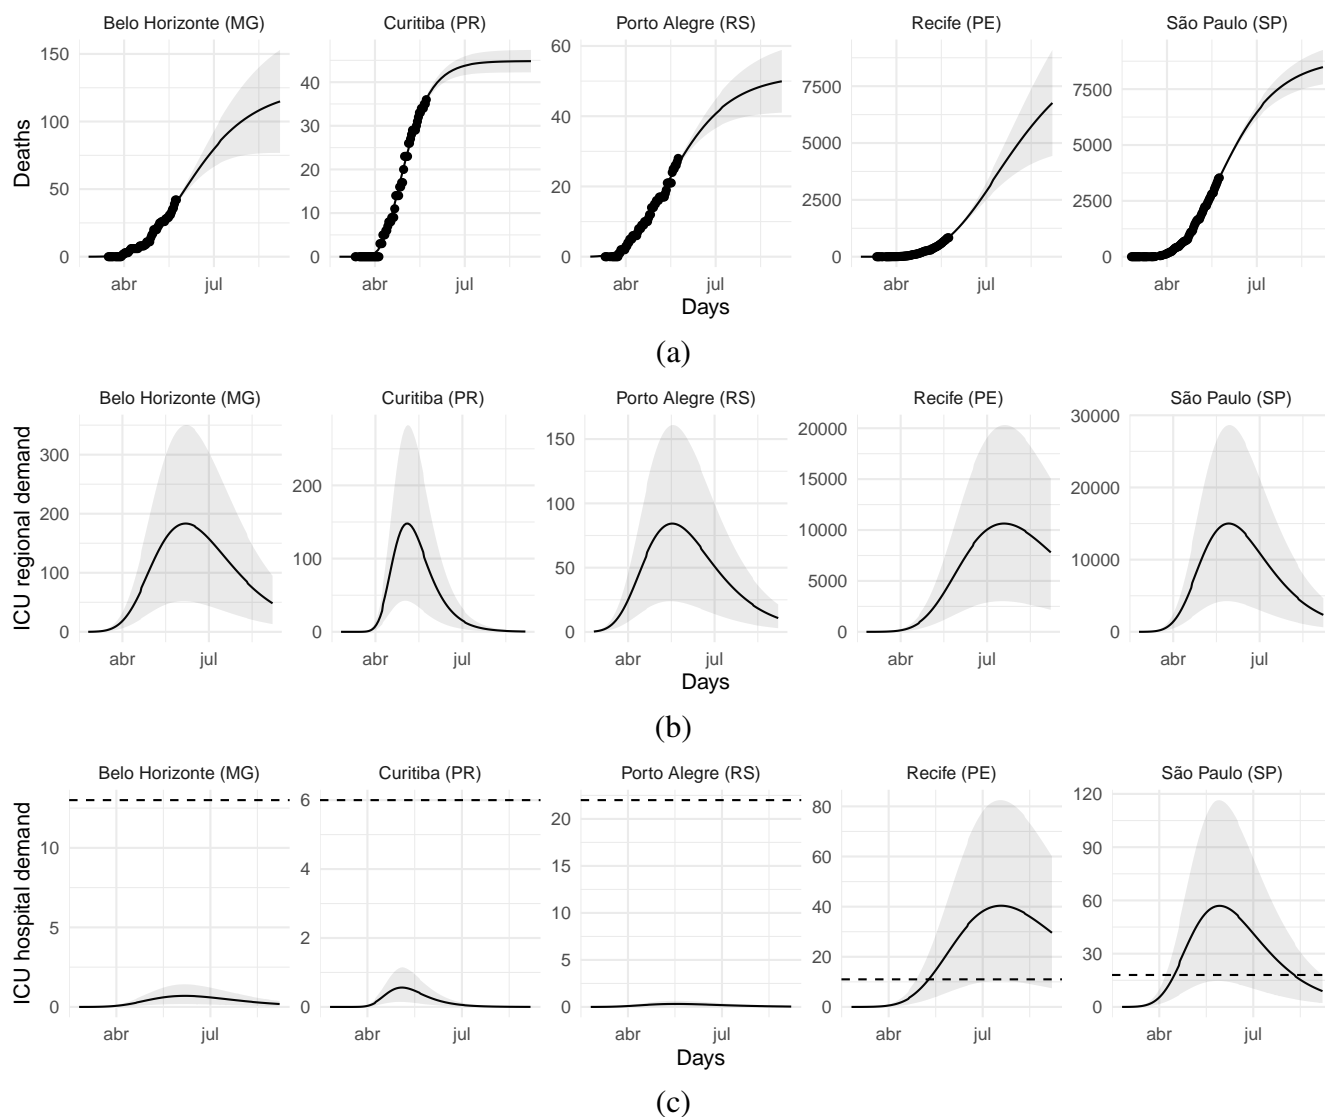

**Figure 2.** Pandemic dynamic estimation for five cities in Brazil. The selected cities are Belo Horizonte (MG), Recife (PE), Curitiba (PR), Porto Alegre (RS) and São Paulo (SP). The top five figures represent the cumulative death rate per region. The five center figures express the expected dynamics of the disease. The bottom five figures represent the market-share fraction expected to be attended by the analyzed hospital.

136 This growth ceases from the moment the hospital situation begins to regularize (in the present example,  
 137 we believe that around 08/27/2020). The construction of this cut-line takes into account the situation of the  
 138 hospital in facing the pandemic.

139 The board of the hospital’s under analysis, in the face of the pandemic, may use the cut-line as an aid in  
 140 decision making, estimated by the considered approximations and assumptions, supporting the hospital’s  
 141 regularization situation by the following steps:

- 142 1. Based on the death count due to COVID-19. We obtain an estimate for this behavior, and, from it, we  
 143 add other sources of uncertainty, such as under-reporting factors.
- 144 2. Conditioning the real death curve, we consider the estimated relationship between the death and  
 145 infected curve, added by a randomness factor.



**Gonzatto et al. Safety-Stock: Predicting supply chain demand during the COVID-19 pandemic**

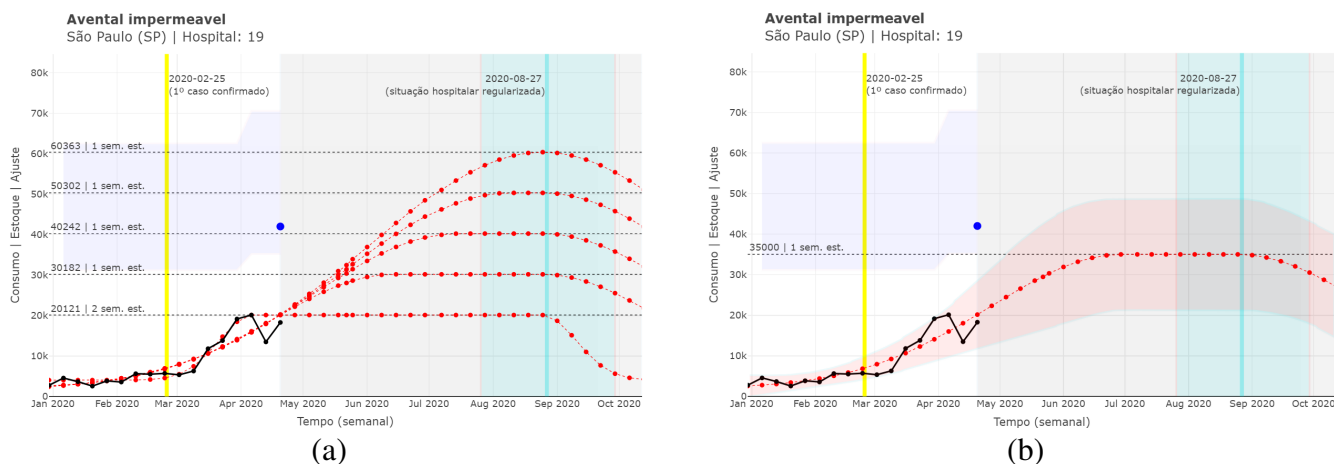

**Figure 3.** Dynamic estimation towards a PPE, considering the simulated hospital. The black line and dots represent the consumption history available in the spreadsheet. The dashed lines (horizontal) in black represent possible consumption limits. Left-hand panel (a) display the different PPE level demands based on the hospital capacities, meanwhile right-hand panel (b) display the chosen option according, e.g. to the supply chain manager. Online platform print, which is available in Portuguese.

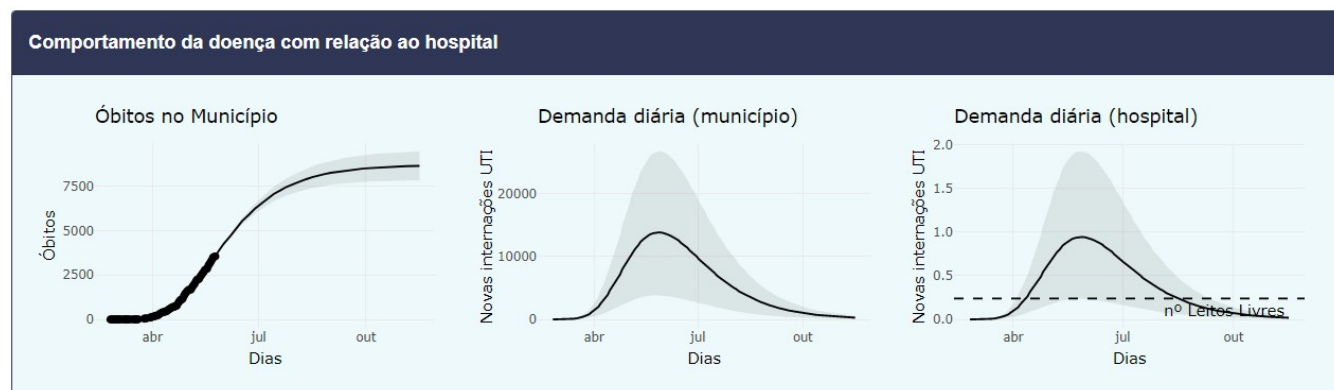

**Figure 4.** Pandemic dynamic per region based on the analyzed hospital. Left-hand panel plots the death growth, center panel related to the region’s demand curve, and right-hand panel display the daily estimation demand of the hospital. Online platform print, which is available in Portuguese.

- 146 3. Subsequently, via the infected curve, estimates of the fraction of hospitalized and, of those hospitalized,
- 147 those who need ICU admission.
- 148 4. From the curve of intensive care unit inpatients, we considered the average number of days in
- 149 the intensive care unit, and, given this consideration and the randomness involved, we took an
- 150 approximation, even if gross, of the curve of recoveries.
- 151 5. The difference between the intensive care unit inpatients curve and the recoveries curve leads us to a
- 152 hospital demand curve for intensive care unit beds.

153 The fraction of the curve that applies to the hospital under analysis is considered an estimate by market-

154 share. In the first panel (left) in the Figure 4 estimates the death dynamics of the Brazilian municipalities

155 (extracted by the website [brasil.io](http://brasil.io)), later this growth curve helped in the corrected estimation bypassing

156 the underreporting of COVID-19, see more details in the appendices. The central panel is related to the

157 region’s demand curve, and finally, the right panel adds the daily demand of the hospital (being a fraction

158 of the region answered by market-share).

159 The total sum will represent the Forecast Horizon can be increased by a percentage defined in the %  
160 security field. The fragmentation of this forecast according to the percentage of consumption of each item  
161 individually, in the last 30 days.

162 As an auxiliary tool, the expected demand for each group of commonly used items in the pandemic will  
163 be broken down into individual products (with different references). This table can be exported and aims to  
164 consider the different scenarios that relate to the maximum consumption.

165 Perhaps the essential point of this tool is the accumulated record of hospitals that need to be helped, and  
166 those that can help others. This initiative can be materialized with an indicator that tells us if the hospital  
167 can help, or needs help, after analyzing the situation of lack or over-stock for each general class of PPE or  
168 the need to purchase more supplies.

169 To learn about the tool flow of information, interested readers can refer to Appendix D, where we illustrate  
170 the flow of information that runs internally in tool according to Figure ref fig: IF.

#### 4 FINAL COMMENTS

171 Prediction modeling was developed by combining hospital's historical data and the disease growth curve.  
172 The idea is to provide a safety stock, avoiding a possible lack of PPE during the COVID-19 pandemic.  
173 The developed computational tool provides to the hospital managers a forecast for the consumption of  
174 several PPEs, taking into account the expected number of patients that arrive in the emergency room with  
175 COVID-19 symptoms, as well as the expected percentage of those that need intensive care. As a result, the  
176 safety stock of PPEs can be estimated. Consequently, it may be rearranged among geographically close  
177 hospitals, preventing attendance restrictions, and avoiding unnecessary expenses.

178 The proposed approach is naive in different ways. For instance, we chose to assume a random structure  
179 based on a symmetric probability distribution for the errors, both in the adjust of the consumption curve  
180 ( $C_t$ ) and the death curve ( $Y_t$ ). The choice of such distributions may not be the most appropriate one. We use  
181 some indirect results. In other words, the raw data directly accessed in the statistical estimation processes  
182 correspond to the recent history of the consumption of any PPE and the death record in a particular  
183 city. All other information carries subjectivities and uncertainties that we cannot quantify in light of the  
184 analyzed data. Although, the theoretical support of the studies that provided such information allowed us to  
185 understand the observed average behaviors as premises in our modeling. Finally, the considered growth  
186 models are simple.

187 All of these points can be refined and addressed in future studies. For instance, assign a possibly  
188 asymmetric probability distribution for the errors, joint statistical modeling the various information, with  
189 data directly accessed by us, and consider other growth models and then use statistical selection among  
190 different models.

191 On the other hand, naivety also has some attractive advantages. Scalability is one of them since complex  
192 models commonly require computationally intensive methods, many of them need a more substantial  
193 amount of information to express good results and the computational processing time is considerably  
194 longer. In this sense, our naive approach allows the use and diffusion of the proposed methodology on a  
195 broader spectrum of possibilities, such as the use of our computational tool with updating in real-time.  
196 Another interesting point is that researchers from other areas can clearly understand the methodology, and  
197 its results can be effectively internalized. Besides, the integrated set of small independent solutions, such as  
198 the proposal presented here, can serve as a basis for more in-depth investigations by expressing insights  
199 that are difficult to perceive in individual analyzes.

**Gonzatto et al. Safety-Stock: Predicting supply chain demand during the COVID-19 pandemic**

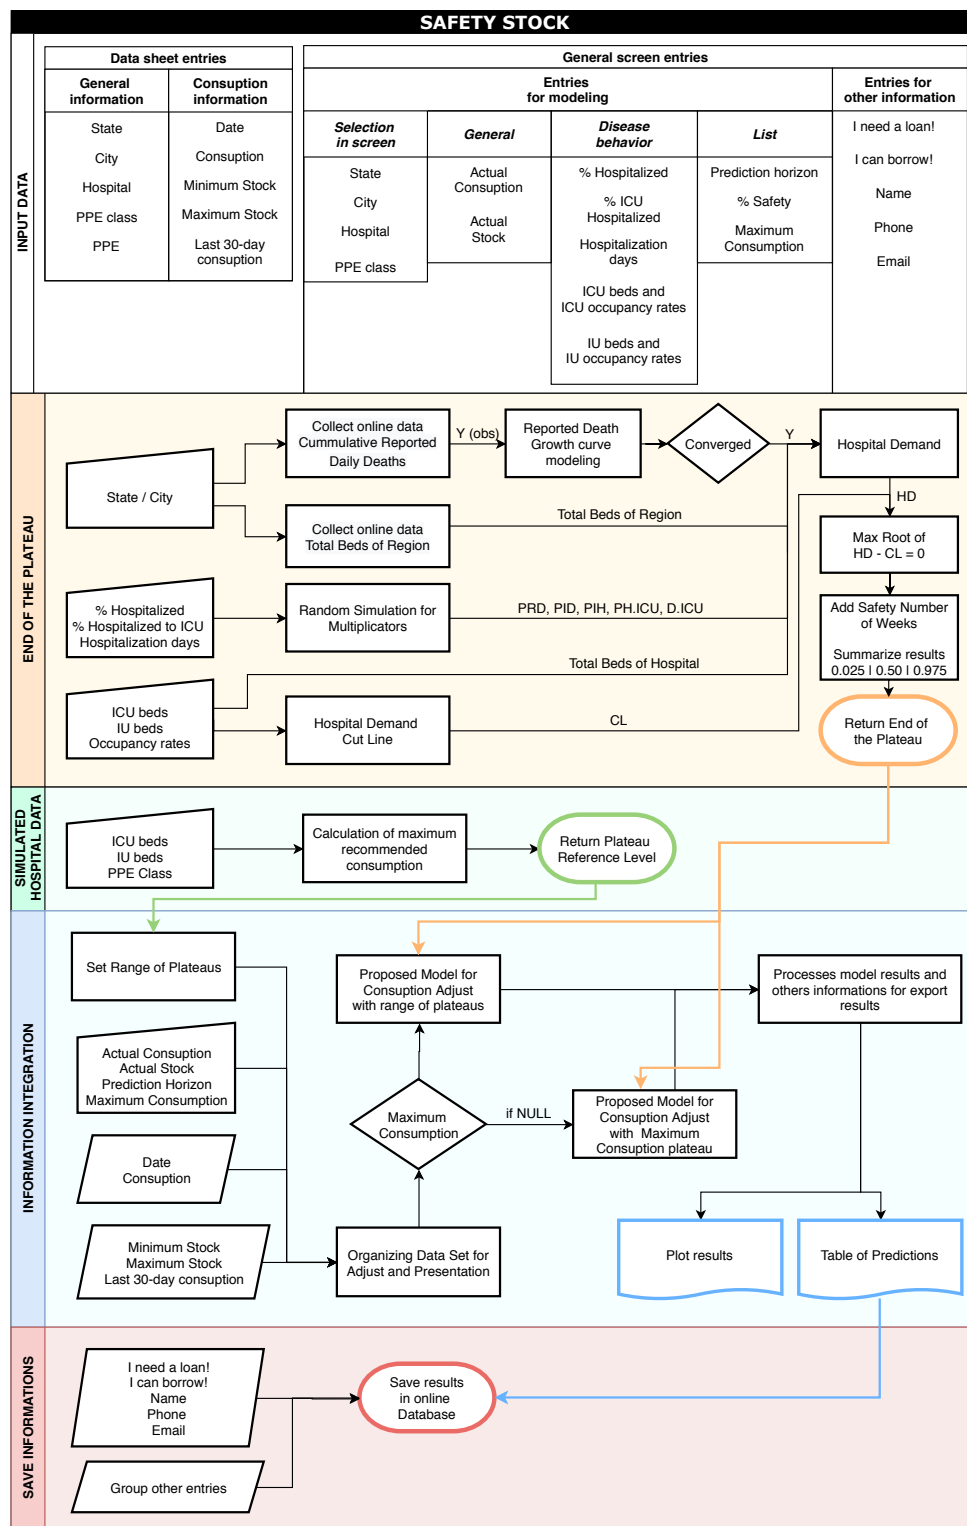

**Figure 5.** Tool information flow.

200 Moreover, the results obtained with our computational tool were exposed to some PPE managers of some  
 201 Brazilian hospitals. The degree of agreement with the reality of their practical activities encourages us the  
 202 continuity of the development, maintenance, and dissemination of our research and free tool.



## CONFLICT OF INTEREST STATEMENT

203 The authors declare that the research was conducted in the absence of any commercial or financial  
204 relationships that could be construed as a potential conflict of interest.

## ACKNOWLEDGMENTS

205 The research was carried out using the computational resources of the Center for Mathematical Sciences  
206 Applied to Industry (CeMEAI), funded by FAPESP (grant number 2013/07375-0). José Alberto Cuminato  
207 and Francisco Louzada are supported by the Brazilian agency CNPq (grant number 302954/2015-4 and  
208 301976/2017-1, respectively).

## APPENDIX A – STATISTICAL METHODOLOGY

209 Consumption/demand curve. In principle, we consider a random variable  $C_t$  denoting the *consumption of a*  
210 *given PPE over time t*, normally distributed with mean  $\mu_t$  and variance  $\sigma^2$ .

The adopted statistical model aims to parameterize the growth behavior of the demand for a product, followed by a (possibly) period of constant high demand, then accompanied by a decline in demand. Thus,  $\mu_t$  is assumed as a five parameters function given by

$$\mu_t = f(t; a, b, c, d, e) = \begin{cases} a + (d - a) \exp \left\{ -\frac{(c - t)^2}{b} \right\}, & \text{if } t \leq c, \\ d, & \text{if } c < t \leq e, \\ a + (d - a) \exp \left\{ -\frac{(t - e)^2}{b} \right\}, & \text{if } t > e \text{ or } c \geq e, \end{cases} \quad (1)$$

211 where  $a$  denotes the magnitude of basic consumption, here assumed to be constant,  $b$  denotes the intensity  
212 of growth/decrease in consumption over time,  $c$  denotes the point in  $t$  that the maximum consumption is  
213 reached,  $d$  denotes the magnitude of maximum consumption,  $e$  denotes the point in  $t$  that consumption  
214 begins to decrease.

215 According to the variation of parameters  $a, b, c, d$  and  $e$ , some possible behaviors for the mean of the  
216 proposed model can be observed in Figure 6.

217 The described proposal that relates the model  $C_t$  with the consumption curve with the regional  
218 epidemiological characteristics and interior features of a particular hospital takes into account three  
219 fundamental aspects. The recent historical record of hospital consumption of a given PPE, The maximum  
220 consumption level of the PPE, How long the hospital stays on the maximum consumption level. Each  
221 of these features requires the observation of distinct information sources and generate meaningful  
222 interpretations for the model building, as follows.

- 223 1. The recent historical record of hospital consumption of a given PPE provides information of the  
224 baseline demand before the COVID-19 pandemic (represented by the model parameter  $a$ ) and evidence  
225 of changing in the consumption regime (represented by the model parameter  $b$ );
- 226 2. The maximum level of PPE consumption considers the maximum capacity and the totality of the  
227 hospital staff dedicated to COVID-19 patients care (this maximum level is represented by the parameter  
228  $d$  of the model and, as it is a fixed and particular characteristic of each hospital and PPE, it is set as a  
229 known parameter). This information is determined based on the procedure described in Appendix B;

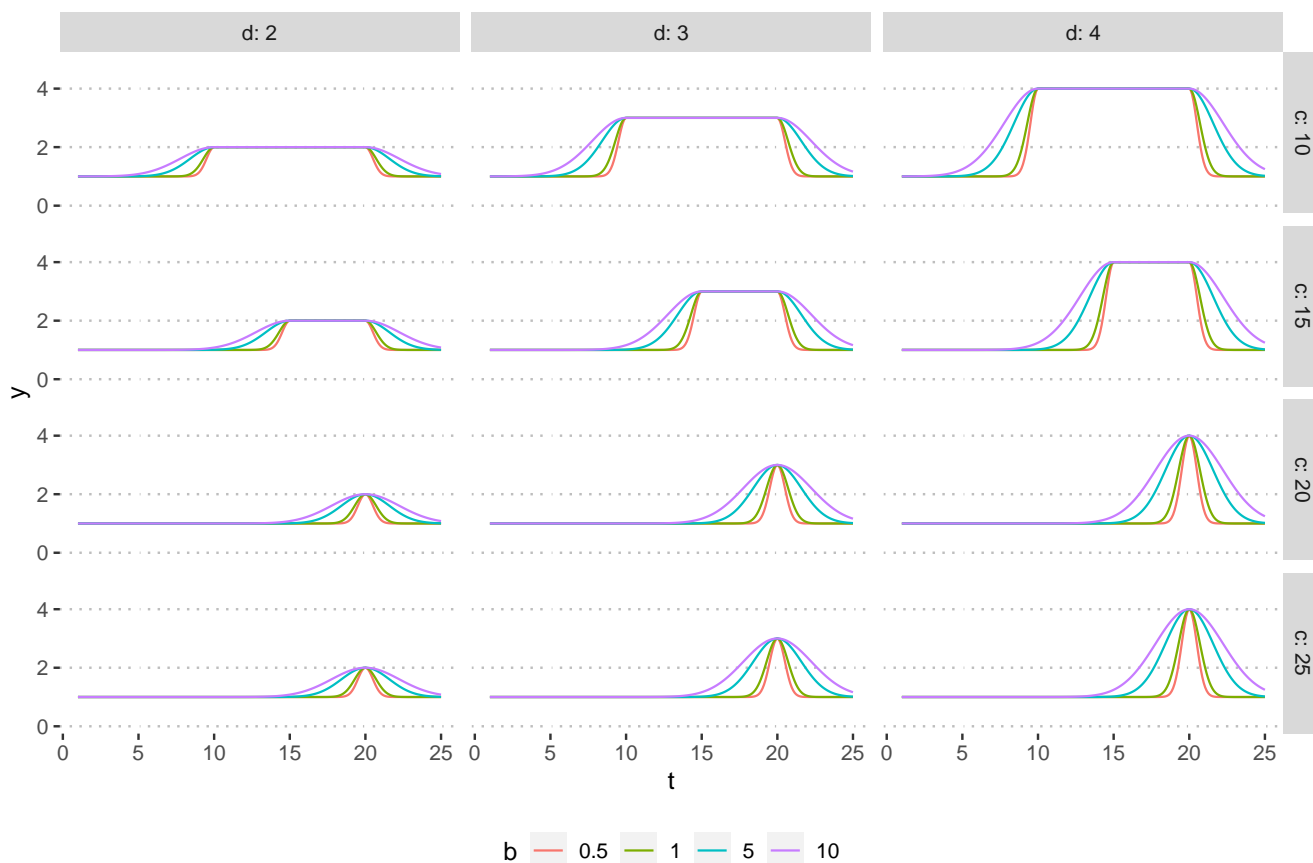

**Figure 6.** Some possibly behaviors of  $\mu_t$  for fixed values of  $a = 1$ ,  $e = 20$  and  $b = 0.5, 1.0, 1.5, 10$ ,  $c = 10, 15, 20, 25$  and  $d = 2, 3, 4$ .

230 3. The time spent on the maximum consumption regime (whose endpoint in  $t$  is represented by the  $e$   
 231 parameter of the model) is determined by the use of hospital information and the region around it. It is  
 232 estimated indirectly and is subsequently used in the model for the consumption curve,  $C_t$ , as a fixed  
 233 parameter (just like the parameter  $d$ ). The determination of the  $e$  parameter, defined as known in the  
 234 model for  $C_t$ ), is done as described in Appendix C.

235 The combined use of information obtained from these three perspectives makes the theoretical model  
 236 adopted to relate the epidemiological characteristics of the region, as well as demand features of the supply  
 237 chain of the hospital under study.

238 In this sense, as the parameters,  $d$  and  $e$  are determined indirectly (see Appendices B and C) therefore  
 239 considered known in the curve expressed by  $\mu_t$ , the parameters  $a, b$  and  $c$  must be estimated by some  
 240 estimation process.

241

242 Estimation Process. We define the random structure, based on a set of observations from recent  
 243 consumption history  $\mathbf{C} = (C_{t_1}, \dots, C_{t_n})$ ,  $C_{t_i} = f(t_i; a, b, c) + \varepsilon_i$ , where  $\varepsilon_i \stackrel{iid}{\sim} N(0, \sigma^2)$ , for  $i = 1, \dots, n$ .

244 The parameters  $\theta = (a, b, c) \in \sigma^2$  are estimated by considering the log-likelihood function, given by

$$\ell(\theta, \sigma^2) = -\frac{n}{2} \log \sigma^2 - \frac{1}{2\sigma^2} \sum_{i=1}^n \left[ c_{t_i} - f(t_i; \theta) \right]^2 = -\frac{n}{2} \log \sigma^2 - \frac{1}{2\sigma^2} \text{RSS}(\theta), \quad (2)$$

245 where  $\text{RSS}(\theta)$  denotes the residual sum of squares.

246 If we use non-informative or sufficiently vague a priori information for the parameters, we have that an  
247 estimator for  $\theta$  and  $\sigma^2$  can be obtained by maximizing (2), which occurs with the minimization of  $\text{RSS}(\theta)$   
248 ( $\theta$  is independent of  $\sigma^2$ ). In addition,  $\partial \ell / \partial \sigma^2 = 0$  has a solution given by  $\hat{\sigma}^2 = \text{RSS}(\hat{\theta})/n$ , while  $\hat{\theta}$  is the  
249 least squares estimator of  $\theta$  (9). The standard error of the estimators can be obtained based on the Fisher  
250 Information matrix and the prediction intervals are determined using the Delta Method (4).

## APPENDIX B – SIMULATED HOSPITAL DATA

251 In order to evaluate the proposed model, a simulated hospital environment was considered, based on  
252 ANVISA, the Brazilian Health Regulatory Agency (2). This simulation serves as a general example for the  
253 hospitals in which the model will be applied, and its characteristics (staff and material consumption) were  
254 defined using data provided by experts.

255 The hospital allocates its patients into three categories: Inpatient Units (IU), Intensive Care Units (ICU),  
256 and Emergency Room (ER). IU patients are in a non-critical state, while ICU patients are in a critical state,  
257 demanding more human resources and materials. The number of hospital beds is divided between both  
258 units, and IU beds can be turned into ICU if needed. ER patients are on hold to be transferred to either IU  
259 or ICU. Therefore they are not considered to be occupying hospital beds.

260 The allocation of doctors, nurses, and physiotherapists is shown in Table 1. The number of IU and ICU  
261 needed staff is given based on the number of occupied beds, except for doctors for IU patients, which is  
262 given by the number of total hospital beds, regardless of their occupation. Column IU/RRT shows the staff  
263 allocated to IUs as Rapid Response Team (RRT). In these columns, the numbers represent the staff needed  
264 for 12-hour shifts, while numbers on the ER column represent the daily staff needed for a unit with an  
265 average of 10.000 treatments per month, which also work on 12-hour shifts.

**Table 1.** Staff allocation in the simulated hospital.

| Staff            | IU                | IU/RRT       | ICU         | ER |
|------------------|-------------------|--------------|-------------|----|
| Doctors          | 1 / 10 total beds | 1 / 100 beds | 1 / 10 beds | 20 |
| Nurses           | 1 / 6 beds        | 1 / 100 beds | 1 / 8 beds  | 10 |
| Physiotherapists | 1 / 20 beds       | 1 / 100 beds | 1 / 10 beds | -  |

IU e ICU: values for a 12-hour shift; ER: daily values for an unit with 10.000 monthly treatments.

266 Table 2 shows the consumption of critical material per professional during a 12-hour shift. These values  
267 estimate what is used taken from a series of premises and observations on real hospitals.

268 The consumption of other essential materials needs to be estimated by other means. The use of Hand  
269 Sanitizer varies from hospital to hospital since it can be replaced by regular soap. In this case, it is assumed  
270 the daily use of 20mL for each IU and ICU patient and 5mL for each ER suspected patient (which is  
271 estimated as 50%). Doctors, nurses, and physiotherapists use N95 Masks, at a rate of 1 each 14-day period  
272 or ten shifts, thus depending on the staff rotation rather than hospital occupancy.

**Table 2.** Material consumption in the simulated hospital.

| Material                | Doctor | Nurse | Physiotherapist |
|-------------------------|--------|-------|-----------------|
| Surgical Mask (unit)    | 6      | 6     | 6               |
| Waterproof Apron (unit) | 1      | 2     | 2               |
| Hospital Cap (unit)     | 1      | 1     | 1               |
| Procedure Gloves (pair) | 5      | 10    | 10              |
| Sterile Gloves (pair)   | 2      | -     | 20              |

Average values per professional in a 12-hour shift.

273 Lastly, as a premise, the obtained values are increased by 40% to consider material usage from cleaning  
274 and technical staff, visitors, and incoming patients, as well as hospital waste.

## APPENDIX C – CALCULATING THE END OF THE PLATEAU

275 For the determination of a cut-line, from which the number of beds available in the hospital becomes again  
276 higher than the daily demand of patients in ICU (represented by the parameter  $e$  in the model (1)), we  
277 used the information of the number of notified deaths accumulated over time (here denoted by the random  
278 variable  $Y_t$ ) and other hospital information as described below.

279 The growth curve of  $Y_t$  can be estimated by a nonlinear growth curve model, such as the Logistic model  
280 (11, chap. 6), Gompertz, Richards (14), Von Bertalanffy (6), among others. The selection between the  
281 most appropriate model for each region can be made based on some statistical criteria such as AIC, AICc,  
282 BIC (see, for instance, 16). The estimation process is analogous to what is described in Appendix A.

283 From the estimated curve for  $Y_t$ , we consider a brief simulation study to approach the *hospital demand*  
284 curve. We incorporate other sources of uncertainty, such as underreporting factors and lethality rates,  
285 among others. The characterization of such sources of uncertainty has theoretical support in studies already  
286 published, which support the average behavior defined here as a known premise. This approach may  
287 represent a current limitation of the study since we do not contemplate the joint analysis of all the factors  
288 involved, which can be incorporated for future studies, though such information has already been obtained  
289 and validated by other sources.

290 Thus, the steps performed are the following:

- The *reported deaths* curve ( $Y_t$ ) is a fraction of the *actual deaths* ( $Y_t^*$ ), which means that

$$Y_t = P_{RD} \times Y_t^*, \text{ where } P_{RD} \sim \text{Beta}(\alpha_1, \beta_1).$$

291 The probability distribution of  $P_{RD}$  (proportion of reported deaths) has been defined so that we  
292 consider the parameters  $\alpha_1$  and  $\beta_1$  to be known, such that  $\mathbb{E}(P_{RD}) = \alpha_1 / (\alpha_1 + \beta_1) = 0.4$  and  
293  $SD(P_{RD}) = \sqrt{\alpha_1 \beta_1 / [(\alpha_1 + \beta_1)^2 (\alpha_1 + \beta_1 + 1)]} = 0.05$ . Such assumptions take into account the  
294 researchers such as (12, 3) which indicate that the number of *real deaths* is around 2.6 times the  
295 number of *reported deaths*.

- We understand that the *real deaths* curve ( $Y_t^*$ ) is proportionally related to the *infected* curve ( $I_t$ ), as follows,

$$Y_t^* = P_{ID} \times I_t, \text{ where } P_{ID} \sim \text{Beta}(\alpha_2, \beta_2).$$

296 The probability distribution of  $P_{ID}$  (proportion of infected-to-death) was defined considering  
297 known  $\alpha_2$  and  $\beta_2$ , such that  $\mathbb{E}(P_{ID}) = \alpha_2 / (\alpha_2 + \beta_2) = 0.0037$  and  $SD(P_{ID}) =$   
298  $\sqrt{\alpha_2 \beta_2 / [(\alpha_2 + \beta_2)^2 (\alpha_2 + \beta_2 + 1)]} = 0.0001$ . The distribution parameter of the random variable  $P_{ID}$

299 was set based on the results of (13, 5) which pointed out that the actual lethality rate of the disease is  
300 around 0.37%;

- The *hospitalized* ( $H_t$ ) and *hospitalized in ICU* ( $H_{ICU,t}$ ) curves are assumed to correspond to fractions of the curve of *infected*, as follows

$$H_t = P_{IH} \times I_t, \text{ where } P_{IH} \sim \text{Beta}(\alpha_3, \beta_3).$$

and

$$H_{ICU,t} = P_{HICU} \times H_t, \text{ where } P_{HICU} \sim \text{Beta}(\alpha_4, \beta_4).$$

301 Similarly, the probability distribution of  $P_{IH}$  (proportion of infected-to-hospital) and  $P_{HICU}$  (proportion  
302 of hospitalized-to-ICU) are defined as  $\mathbb{E}(P_{IH}) = \mathbb{E}(P_{HICU}) = 0.25$  and  $\text{SD}(P_{IH}) = \text{SD}(P_{HICU}) =$   
303  $0.05$ . This is justified since (8, 5) show that approximately 25% of the infected need some hospital  
304 care, and 25% of those need a ICU.

- The *recovered* curve ( $R_t$ ), from ICU situation, was approximated by the translate of the difference between *hospitalized in ICU* curve ( $H_{ICU,t}$ ) and the *real deaths* curve ( $Y_t^*$ ), as follows (17)

$$R_t \approx (H_{ICU} - Y^*)_{t+D_{ICU}}, \text{ where } D_{ICU} \sim \text{Poisson}(\lambda).$$

305 The probability distribution set to  $D_{ICU}$  (days in ICU) takes into account that  $\mathbb{E}(D_{ICU}) = \lambda = 14$ ,  
306 since (10) indicated that the clinical recovery for patients in ICUs is approximately two weeks.

- In addition, we understand that the difference between the *hospitalized in ICU* curve ( $H_{ICU,t}$ ) and the *recovered* curve ( $R_t$ ) of the ICU situation approximates the *regional demand* curve ( $RD_t$ ) for ICU beds. Therefore

$$RD_t \approx (H_{ICU} - R)_t.$$

- Finally, we assume that the *hospital demand* curve ( $HD_t$ ) is a fraction of the *regional demand* curve ( $RD_t$ ), weighted by market-share (MS) associated with a particular hospital. Therefore

$$HD_t = \text{MS} \times RD_t.$$

307 The multiplier MS was not considered as a random variable. Its value is determined by the number  
308 of beds in the hospital and the number of beds available in the region close to the hospital, whose  
309 information is collected directly from a Brazilian health database called DataSUS.

Now, once we approximated the *hospital demand* curve ( $HD_t$ ), we have established a cut-line for the hospital's service capacity. This is done by considering the number of IU and ICU beds (named as  $IU_B$  and  $ICU_B$ , respectively) and their occupancy rates (named as  $OR_{IU}$  and  $OR_{ICU}$ , respectively). Since around 20% of IU beds can be upgraded to act as an ICU bed, the cut-line is given by

$$\text{CL} = \text{ICU}_B \times (1 - \text{OR}_{ICU}) + 0.2 \times \text{IU}_B \times (1 - \text{OR}_{IU}).$$

310 Thus making  $HD_t = \text{CL}$ , we identify the cutoff point,  $t^{(1)}$ , which indicates that the ICU service capacity  
311 has been exceeded (if applicable) and the point at which it has returned to normal is  $t^{(2)}$ .

312 The point  $t^{(2)}$  and all the uncertainty associated with it, via the variability of  $P_{RD}$ ,  $P_{ID}$ ,  $P_{IH}$ ,  $P_{HICU}$ , and  
313  $D_{ICU}$ , result in a range of possible time points, where the hospital situation is expected to return to normal.



314 The average value of these estimates is set as the cut-line represented by the parameter  $e$  of the model (1)  
315 (assumed known in this stage of the modeling).

## APPENDIX D – SAFETY STOCK TOLL INFORMATION FLOW

316 In this appendix, we illustrate the flow of information that runs internally on the computational tool (Figure  
317 5). All input data is listed in the INPUT DATA panel. The remaining processes are divided into four  
318 large blocks: 1) The END OF THE PLATEAU panel outlines the cut line estimation process from which  
319 we understand that the hospital situation begins to regularize. 2) The SIMULATED HOSPITAL DATA  
320 panel represents the stage of determining the maximum consumption level used as a reference in the later  
321 stage. 3) The INFORMATION INTEGRATION panel shows the flow of joining the information obtained  
322 previously, for the construction and presentation of the solution. 4) Finally, the SAVE INFORMATION  
323 panel condenses the records that must be saved in the online database.

324 In the INPUT DATA panel, a categorization of the entries can be seen. The first one deals with  
325 the datasheet loaded by the user of the tool and corresponds to the identification information (of the  
326 region, hospital, and PPE class), the historical consumption record, and the stock requirements. All other  
327 information is provided via the platform screen. Some of them deal with empirical aspects about the  
328 disease's behavior in the region of the hospital (or the hospital itself), such as the average number of  
329 days that a patient remains in the ICU, or other epidemic information that is particularized in specific  
330 health centers. All the above information is defined by default (regarding recent medical literature) at the  
331 beginning of the user's section. However, it can (and should) be modified to meet the specific practical  
332 reality of that hospital.

333 Other necessary entries deal with some small configurations about the forecast stage of the model, such  
334 as the forecast horizon and the safety percentage added.

335 The second frame, END OF THE PLATEAU, link the flow of information used to determine the cut  
336 line represented by the parameter  $and$  of the model 1. Considering the location set by the user, a platform  
337 module searches online for the death record in that region, updated daily. Besides, there is a query in the  
338 dataSUS database about the number of beds available in the given location. Another module adjusts a  
339 growth curve to the data collected from that curve. Some transformations will be made in order to obtain  
340 the hospital demand curve. The transformations are made with the aid of some multipliers (which weigh  
341 the death curve  $P_{IH}$ ,  $FHU$ ,  $P_{ID}$ , among others), and a factor that translates the curve over time ( $D_{ICU}$ ).  
342 The multipliers are obtained by a module via random simulation, considering the exposed in Appendix 4.  
343 Having access to the hospital's demand curve in another block of code, we determined some possible dates  
344 for the plateau's end, considering the cut line obtained based on the entries associated with the number of  
345 beds and respective occupations.

346 In the third table, SIMULATED HOSPITAL DATA, the maximum consumption reference level is  
347 obtained by a module that makes use of information on the number of total beds, and the product class.  
348 The dimension of this plate takes into account all aspects listed in Appendix 4.

349 The fourth table expresses the joint use of the information obtained in Tables 1 to 3. The maximum  
350 consumption stipulated by the user indicates which stage of the analysis he is. Failure to fill in this entry  
351 means that the consumption curve adjustment model considers a range of plateaus set based on the reference  
352 plateau. On the other hand, if the user has already defined the maximum consumption, the model fits a  
353 single curve, associated with that consumption, at the end of the analysis, this will be the curve used to

354 make and save the forecasts. Other modules are in charge of generating the forecast table and the graph  
355 that outlines the adjusted model compared to the observed data and other relevant information.

356 The last panel summarizes the information that will be exported to the company's database responsible  
357 for an intermediate between hospitals that self-declared as potential helpers (for the loan or exchange of  
358 PPE) and those who declared that they need help.

## REFERENCES

- 359 1 .Abdulsalam, Y. and Schneller, E. (2019). Hospital supply expenses: An important ingredient in health  
360 services research. *Medical Care Research and Review* 76, 240–252. doi:10.1177/1077558717719928.  
361 PMID: 29148349
- 362 2 .[Dataset] Anvisa (2020). Orientações para serviços de saúde: Medidas de prevenção e controle  
363 que devem ser adotadas durante a assistência aos casos suspeitos ou confirmados de infecção  
364 pelo novo coronavírus (sars-cov-2). [http://portal.anvisa.gov.br/documents/  
365 33852/271858/Nota+T%C3%A9cnica+n+04-2020+GVIMS-GGTES-ANVISA/  
366 ab598660-3de4-4f14-8e6f-b9341c196b28](http://portal.anvisa.gov.br/documents/33852/271858/Nota+T%C3%A9cnica+n+04-2020+GVIMS-GGTES-ANVISA/ab598660-3de4-4f14-8e6f-b9341c196b28). Accessed: 2020-25-05
- 367 3 .[Dataset] Burn-Murdoch, J., Romei, V., and Giles, C. (2020). Global coronavirus death toll could be  
368 60% higher than reported. *Financial Times – Coronavirus*. [https://www.ft.com/content/  
369 6bd88b7d-3386-4543-b2e9-0d5c6fac846c?utm\\_source=Nature+Briefing&  
370 utm\\_campaign=527dbb4637-briefing-dy-20200428&utm\\_medium=email&utm\\_  
371 term=0\\_c9dfd39373-527dbb4637-43284197](https://www.ft.com/content/6bd88b7d-3386-4543-b2e9-0d5c6fac846c?utm_source=Nature+Briefing&utm_campaign=527dbb4637-briefing-dy-20200428&utm_medium=email&utm_term=0_c9dfd39373-527dbb4637-43284197) (Accessed: 2020-27-05)
- 372 4 .Casella, G. and Berger, R. L. (2002). *Statistical inference*, vol. 2 (Duxbury Pacific Grove, CA)
- 373 5 .[Dataset] CDC (2020). Interim clinical guidance for management of patients with confirmed  
374 coronavirus disease (covid-19). [http://www.cdc.gov/coronavirus/2019-ncov/hcp/  
375 clinical-guidance-management-patients.html](http://www.cdc.gov/coronavirus/2019-ncov/hcp/clinical-guidance-management-patients.html). Accessed: 2020-25-05
- 376 6 .Dey, R., Cadigan, N., and Zheng, N. (2019). Estimation of the von bertalanffy growth model when  
377 ages are measured with error. *Journal of the Royal Statistical Society: Series C (Applied Statistics)* 68,  
378 1131–1147
- 379 7 .[Dataset] Grimm, C. A. (2020). Hospital experiences responding to the covid-19 pandemic: Results of  
380 a national pulse survey march 23-27, 2020
- 381 8 .Guan, W.-j., Ni, Z.-y., Hu, Y., Liang, W.-h., Ou, C.-q., He, J.-x., et al. (2020). Clinical characteristics  
382 of coronavirus disease 2019 in china. *New England Journal of Medicine* 382, 1708–1720
- 383 9 .Migon, H. S., Gamerman, D., and Louzada, F. (2014). *Statistical inference: an integrated approach*  
384 (CRC press)
- 385 10 .[Dataset] Organization, W. H., Organization, W. H., et al. (2020). Report of the who-china joint mission  
386 on coronavirus disease 2019 (covid-19)
- 387 11 .Pinheiro, J. and Bates, D. (2006). *Mixed-effects models in S and S-PLUS* (Springer Science & Business  
388 Media)
- 389 12 .[Dataset] Ruprecht, T. (2020). Entrevista: por que o número de mortes por coronavírus está  
390 subestimado. *Veja Saúde - Abril Mídia S A*. [https://saude.abril.com.br/medicina/  
391 entrevista-por-que-o-numero-de-mortes-por-coronavirus-esta-subestimado/  
392](https://saude.abril.com.br/medicina/entrevista-por-que-o-numero-de-mortes-por-coronavirus-esta-subestimado/) (Accessed: 2020-27-05)
- 393 13 .Streeck, H., Hartmann, G., Exner, M., and Schmid, M. (2020). Vorläufiges ergebnis und  
394 schlussfolgerungen der covid-19 case-cluster-study (gemeinde gangelt). *Preprint published online on* ,  
395 04–09

- 396 **14** .Tjørve, K. M. and Tjørve, E. (2017). The use of gompertz models in growth analyses, and new  
397 gompertz-model approach: An addition to the unified-richards family. *PloS one* 12
- 398 **15** .[Dataset] University, J. H. (2020). Covid-19 dashboard by the center for systems science and  
399 engineering (csse) at johns hopkins university (jhu)
- 400 **16** .Wong, C. and Li, W. K. (1998). A note on the corrected akaike information criterion for threshold  
401 autoregressive models. *Journal of Time Series Analysis* 19, 113–124
- 402 **17** .Zhou, F., Yu, T., Du, R., Fan, G., Liu, Y., Liu, Z., et al. (2020). Clinical course and risk factors for  
403 mortality of adult inpatients with covid-19 in wuhan, china: a retrospective cohort study. *The Lancet*  
404 395, 1054 – 1062
